# Supplementary material for: Accounting for Field-Scale Dry Deposition in Backward Lagrangian Stochastic Dispersion Modelling of NH<sub>3</sub> Emissions
Source: Preprints.org preprint supplement (doi:10.20944/preprints201803.0026.v1), 2018-03-03
Supplement: Supplementary file 1 [file supplementary]

# Dependence of the Canopy Resistance on Environmental Parameters

## 1. Introduction

Because the grass canopy at the experimental site was treated with a broad-spectrum herbicide (glyphosate) one week before the start of the experiment, the stomatal conductance was assumed to be zero and the canopy resistance  $R_c$  was reduced to the non-stomatal (cuticular) resistance  $R_w$ . Several environmental factors influence the magnitude of dry deposition removal [1, 2] and therefore the magnitude of  $R_w$ . Amongst the most prominent ones are the relative humidity (RH), the air temperature (T) and SO<sub>2</sub> co-deposition. For the following analysis, RH and T were extrapolated from the measurements on-site at 1.25 m above ground level (a.g.l.) to the corresponding values at a height of  $d + z_0$ .

## 2. Relative Humidity

An increase in relative humidity enhances the H<sub>2</sub>O content on absorbing surfaces, which favors deposition of NH<sub>3</sub> onto the surface. A log-linear relationship has been suggested to appropriately describe the dependence of  $R_w$  (and therefore, in the present case, also the dependence of  $R_c$ ) on RH [e.g. 3]:

$$\ln(R_w) = \ln(R_{w,min}) + a(100 - RH), \quad (1)$$

where  $RH$  is the relative humidity given in %, and the minimum cuticular resistance  $R_{w,min}$  (as well as the cuticular resistance  $R_w$  itself) is given in s m<sup>-1</sup>. Table 1 in Massad et al. [4] summarizes possible values for parameters  $R_{w,min}$  and  $a$  from different studies on grassland sites. We took the published responses of  $R_w$  on the changes in RH (i.e. parameter  $a$  for type *grassland* and specifications *agriculture*) and fitted Equation (1) to our ‘best estimate’ values  $R_c^1$  (see main paper, Section 2.4.7 and Table A1 in the Appendix) with  $R_{w,min}$  as a free parameter, by minimizing the difference between the fitted values and  $R_c^1$  on a logarithmic scale (Figure 1). The log-linear RH dependency is not capable of appropriately describing the variation in  $R_c^1$ .

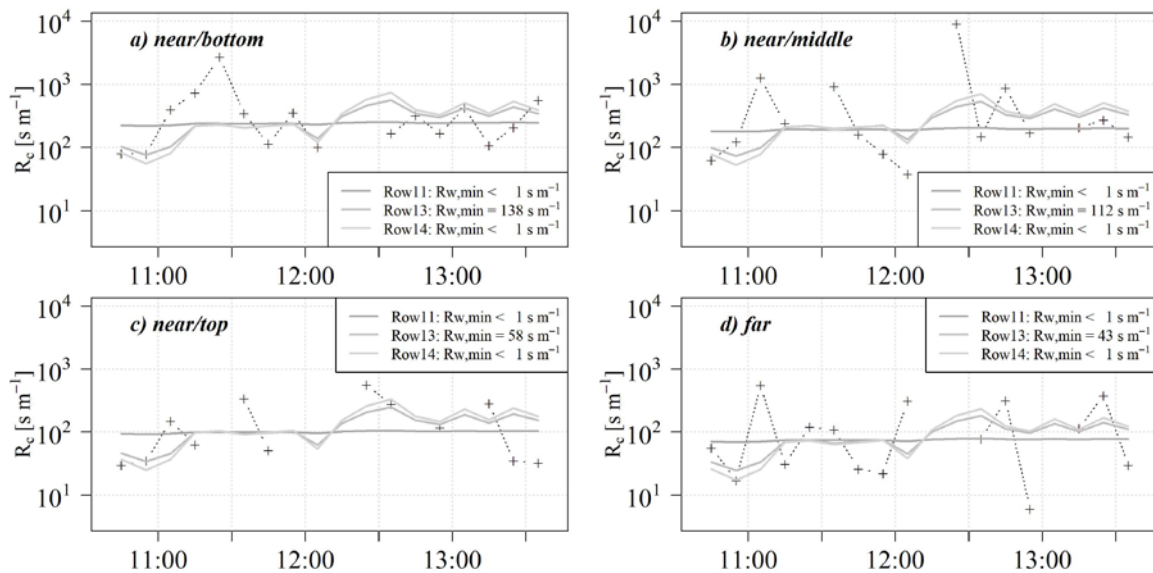

**Figure 1.** Fitted values of  $R_w$  ( $\approx R_c$  in the present study) according to Equation (1) (grey lines) with corresponding estimates of  $R_{w,min}$  (figure legend). Different greys correspond to different RH-responses as published on row 11, 13 and 14 in Table 1 of Massad et al. [4] (i.e. Row11:  $a = 0.143$ , Row13:  $a = 0.008$ , Row14:  $a = 0.110$ ). Black crosses connected by a dotted line show the values of  $R_c^1$ .

as estimated in the main paper (Table A1 in the Appendix). Panels a) - d) show results for the individual measurement locations.

### 3. Temperature

An extension of the dependence of  $R_w$  on air temperature and relative humidity was suggested by Flechard et al. [5] as:

$$\ln(R_w) = \ln(R_{w,min}) + a(100 - RH) + 0.15 \times |T|, \quad (2)$$

where  $RH$  is the relative humidity given in %,  $T$  is the air temperature in °C and  $R_w$  and  $R_{w,min}$  are the (minimal) cuticular resistances given in s m<sup>-1</sup>. The dependence of  $R_w$  on  $RH$  and  $T$  seems to (partially) reproduce the variation in the  $R_c^1$  estimates (Figure 2).

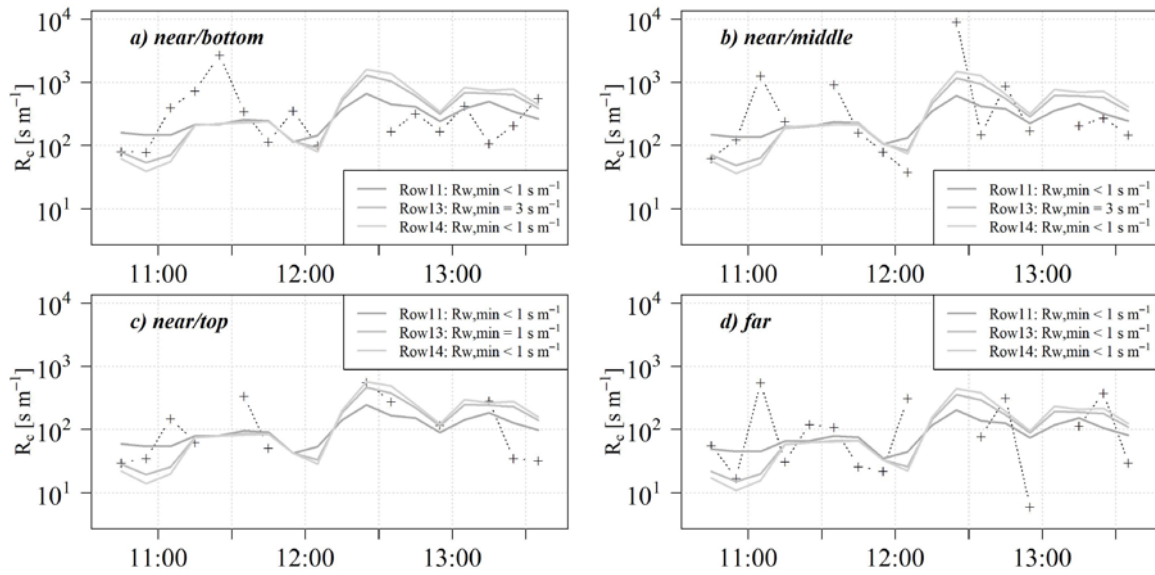

**Figure 2.** Fitted values of  $R_w$  ( $\approx R_c$  in the present study) according to Equation (2) (grey lines) with corresponding estimates of  $R_{w,min}$  (figure legend). Different greys correspond to different  $RH$ -responses as published on row 11, 13 and 14 in Table 1 of Massad et al. [4] (i.e. Row11:  $a = 0.143$ , Row13:  $a = 0.008$ , Row14:  $a = 0.110$ ). Black crosses connected by a dotted line show the values of  $R_c^1$  as estimated in the main paper (Table A1 in the Appendix). Panels a) - d) show results for the individual measurement locations.

### 4. Ambient SO<sub>2</sub> Concentration (Co-Deposition)

Equation (2) was further extended by a dependence on the ambient SO<sub>2</sub> concentration, adapted from Simpson et al. [6] as:

$$\ln(R_w) = \gamma - 2.556 \times \alpha_{SN}, \quad (3)$$

where  $\gamma$  refers to the  $R_w$  dependence on  $T$  and  $RH$  according to Equation (2) (i.e. the r.h.s. thereof) and  $\alpha_{SN}$  refers to the molecular ratio of SO<sub>2</sub> to NH<sub>3</sub> as shown in Figure 3. Equation (3) (i.e. the dependence of  $R_w$  on  $RH$ ,  $T$  and SO<sub>2</sub> co-deposition) seems to (partially) reproduce the variation in the  $R_c^1$  estimates (Figure 4). The  $R_w$  dependence including the SO<sub>2</sub> co-deposition is slightly better reflecting the variation in  $R_c^1$  compared to the dependence on  $RH$  and  $T$  alone (Figure 2).

## Supplement S3 - Dependence of the Canopy Resistance on Environmental Parameters

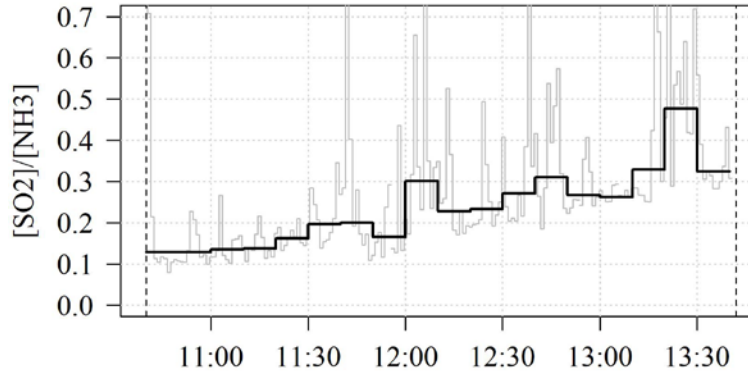

**Figure 3.** Molecular ratio of SO<sub>2</sub> to NH<sub>3</sub> ( $= \alpha_{SN}$ ) as measured during the NH<sub>3</sub> release experiment at a height of 0.5 m above ground level (location *near/bottom*).

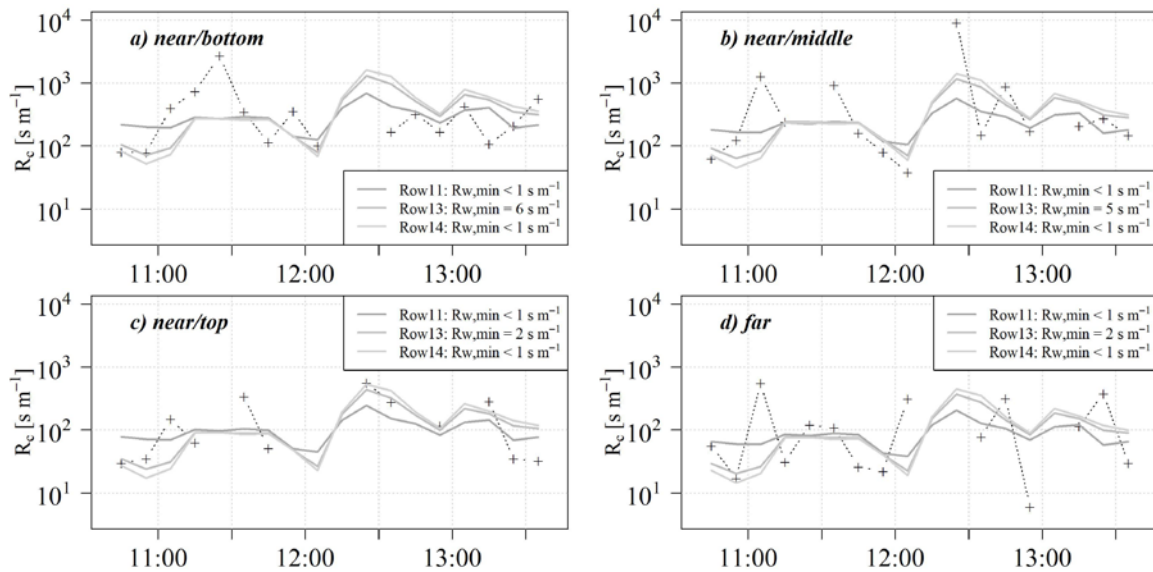

**Figure 4.** Fitted values of  $R_w$  ( $\approx R_c$  in the present study) according to Equation (3) (grey lines) with corresponding estimates of  $R_{w,min}$  (figure legend). Different greys correspond to different RH-responses as published on row 11, 13 and 14 in Table 1 of Massad et al. [4] (i.e. Row11:  $a = 0.143$ , Row13:  $a = 0.008$ , Row14:  $a = 0.110$ ). Black crosses connected by a dotted line show the values of  $R_c^1$  as estimated in the main paper (Table A1 in the Appendix). Panels a) - d) show results for the individual measurement locations.

## References

1. Flechard, C.R.; Massad, R.S.; Loubet, B.; Personne, E.; Simpson, D.; Bash, J.O.; Cooter, E.J.; Nemitz, E.; Sutton, M.A. Advances in understanding, models and parameterizations of biosphere-atmosphere ammonia exchange. *Biogeosciences* 2013, 10, 5183–5225, doi:10.5194/bg-10-5183-2013.
2. Asman, W.A.H.; Sutton, M.A.; Schjørring, J.K. Ammonia: emission, atmospheric transport and deposition. *New Phytol* 1998, 139, 27–48, doi:10.1046/j.1469-8137.1998.00180.x.
3. Sutton, M.A.; Schjørring, J.K.; Wyers, G.P.; Duyzer, J.H.; Ineson, P.; Powlson, D.S. Plant-atmosphere exchange of ammonia [and discussion]. *Philosophical Transactions of the Royal Society A: Mathematical, Physical and Engineering Sciences* 1995, 351, 261–278, doi:10.1098/rsta.1995.0033.
4. Massad, R.S.; Nemitz, E.; Sutton, M.A. Review and parameterisation of bi-directional ammonia exchange between vegetation and the atmosphere. *Atmos. Chem. Phys.* 2010, 10, 10359–10386, doi:10.5194/acp-10-10359-2010.
5. Flechard, C.R.; Spirig, C.; Neftel, A.; Ammann, C. The annual ammonia budget of fertilised cut grassland - Part 2: Seasonal variations and compensation point modeling. *Biogeosciences* 2010, 7, 537–556, doi:10.5194/bg-7-537-2010.

*Supplement S3 - Dependence of the Canopy Resistance on Environmental Parameters*

6. Simpson, D.; Benedictow, A.; Berge, H.; Bergström, R.; Emberson, L.D.; Fagerli, H.; Flechard, C.R.; Hayman, G.D.; Gauss, M.; Jonson, J.E.; et al. The EMEP MSC-W chemical transport model - technical description. *Atmos. Chem. Phys.* 2012, 12, 7825–7865.
