# Supplementary material for: Accounting for Field-Scale Dry Deposition in Backward Lagrangian Stochastic Dispersion Modelling of NH<sub>3</sub> Emissions
Source: Preprints.org preprint supplement (doi:10.20944/preprints201803.0026.v1), 2018-03-03
Supplement: Supplementary file 2 [file supplementary]

# Package ‘bLSmodelR’

January 27, 2018

**Type** Package

**Title** bLSmodelR - An atmospheric dispersion model in R

**Version** 4.0-0

**Date** 2018-01-27

**Author** Christoph Haeni

**Maintainer** Christoph Haeni <christoph.haeni@bfh.ch>

## Description

This is the backward Lagrangian stochastic (bLS) model as described by Flesch et al. (2004).

**License** GPL-2

**Depends** R (>= 3.4.3), rlecuyer, snow, snowfall, data.table (>= 1.9.8),  
maptools

**Imports** Rcpp (>= 0.12.14), SDMTools, tcltk, parallel, sp, rgeos,  
geosphere, RgoogleMaps

**LinkingTo** Rcpp

**NeedsCompilation** yes

**Archs** i386, x64

## R topics documented:

|                                  |    |
|----------------------------------|----|
| bLSmodelR-package . . . . .      | 2  |
| Class-Sensors . . . . .          | 5  |
| Class-Sources . . . . .          | 6  |
| Class-TDcat . . . . .            | 7  |
| coreModel . . . . .              | 7  |
| deposition . . . . .             | 10 |
| genInputList . . . . .           | 11 |
| genInterval . . . . .            | 13 |
| genModel . . . . .               | 15 |
| genSensors . . . . .             | 16 |
| genSources . . . . .             | 17 |
| genTolerances . . . . .          | 18 |
| ModelFunctions . . . . .         | 19 |
| runbLS . . . . .                 | 20 |
| Undocumented Functions . . . . . | 21 |

|              |           |
|--------------|-----------|
| <b>Index</b> | <b>24</b> |
|--------------|-----------|

## Description

The package **bLSmodelR** provides functions to set up and run a backward Lagrangian Stochastic (bLS) model.

## bLS Model

The model is a first-order Lagrangian Stochastic model that is run in backward mode (i.e. backward in time), assuming horizontally homogeneous and vertically inhomogeneous Gaussian turbulence. It is based on the paper published by *Flesch et al. (2004)*. The basis of the model calculation is a generalized Langevin equation given as

$$du_i = a_i(x, u) * dt + b_{ij}(x, u) * d\xi_j$$

$$dx_i = u_i * dt$$

where  $d\xi$  in the noise term is a random increment from a Gaussian distribution  $N(0, dt)$ . The indices  $i, j = 1, 2, 3$  represent the alongwind (x), crosswind (y) and vertical axis (z) of the rotated coordinate system.  $x_i$  and  $u_i$  are position (x, y, z) and velocity (u, v, w) of the trajectory at time t. An ensemble of upwind trajectories is calculated starting from the sensor position  $x = (0, 0, z_{meas} - d)$  and the position and velocity of trajectory touchdowns on ground (i.e. on a horizontal plane at  $z = z_0 + d$ , where the modelled, average wind speed equals 0.) are recorded to calculate the sensor concentration to source strength relationship as the sum of the inverse touchdown velocities, summed over all touchdowns within the source

$$\frac{C}{E} = \frac{2}{N_{trj}} * \sum_{src} \frac{1}{w_{TD}}$$

Source areas are defined as homogeneously emitting sources, having emission rate  $E$ . As a consequence, the  $C/E$  relationship is expressed in  $s/m$ . In analogy, the flux to source strength ratios ( $\langle u'C' \rangle / E$ ,  $\langle v'C' \rangle / E$ ,  $\langle w'C' \rangle / E$ ) are calculated, mainly for completeness and for possible vertical flux footprint corrections. Trajectories touching ground are perfectly reflected and their velocities are reversed to maintain covariances past reflection. Therefore, no deposition is modelled when trajectory touchdown happens. Further, this model is not capable of modelling chemistry, and trace gases have to be assumed to be reasonably inert within the relevant travelling time. For further details on the model and the concentration to emission rate relationship, see *Flesch et al. (2004)*, *Flesch (1996)* and partly *Flesch et al. (1995)*.

## MOST Profiles

The model calculation is based on Monin-Obukhov similarity theory (MOST) profiles of the wind speed and the wind statistics. As a consequence, the wind characteristics in the model domain can be set up completely by providing the three parameters  $ustar$  (the friction velocity),  $L$  (the Obukhov length) and  $z_0$  (the roughness length). It should be kept in mind that, if MOST can not be applied reasonably, model calculations certainly will be erroneous.

### Wind Speed

The vertical profile of the ensemble average of the horizontal wind speed  $U = \langle u \rangle$  is defined as

$$U(z) = ustar/k_v * \{ \ln(z/z_0) + \Psi(z/L) - \Psi(z_0/L) \}$$

where  $\Psi$  is a stability correction function defined as

$$\begin{aligned} \text{if}(L \geq 0), \Psi(x) &= 4.8 * z/L \\ \text{if}(L < 0), \Psi(x) &= -2 * \ln((1 + \alpha)/2) - \ln((1 + \alpha^2)/2) - 2 * \text{atan}(\alpha) + \pi/2, \end{aligned}$$

where

$$\alpha = (1 - 16 * z/L)^{1/4}$$

#### Wind Statistics

The variances of the different velocity components are assumed to be constant within the model domain (i.e. homogenous), with the exception of the vertical velocity component under unstable atmospheric conditions (i.e. if the Obukhov length is negative,  $L < 0$ ), where the vertical profile function is defined as

$$\sigma w^2 = ustar^2 * bw^2 * (1 - 3 * z/L)^{2/3}$$

and  $bw$  is derived from the supplied  $\sigma w / ustar$  ratio at given height.

#### Zero-Plane Displacement / Displacement Height ( $d$ )

In contrast to *Flesch et al. (2004)*, the zero-plane displacement ( $d$ ) is included in the model profiles, by subtracting  $d$  from any measured, geometric height to give the corresponding aerodynamic heights  $z = z_{meas} - d$ .

### Initiaization of velocities

Initial velocities are calculated by using an orthogonal projection of random ... (explain further)

### Model Input

All model input is supplied from script/console. See [genInputList](#) for further information.

#### Touchdown Catalogs

Existing touchdown catalogs can significantly speed up model runs.

#### Tolerances

If touchdown catalogs will be read, the tolerances for touchdown selection can be set.

### Model Output

#### csv File

The results of the model run can be saved to a csv file (semicolon separated).

#### data.frame/data.table

All results will be given as `data.frames` or `data.table`. See [runbLS](#) for further details.

#### Touchdown Catalogs

Touchdown catalogs can be saved for future runs.

### Parallel Computing

This package provides the option to run some parts of the model calculation in parallel. The number of cores that will be used can be defined via the `ncores` argument in the model input (see [genModel](#) or [runbLS](#)). Parallel computing is done using the package `snow` (and parts of [snowfall](#) and [parallel](#)). If the model is run in parallel mode, two parts of the model will be processed parallel, a) the core C++ routine, calculating the trajectories and corresponding touchdowns, and b) the calculation of the model results (i.e.  $C/E$  etc.) from the touchdown catalogs.

**To Do:**

- Plots (Contour, etc)
- explain output csv
- Docu
- data.table

**Author(s)**

Christoph Haeni

**References**

Flesch, T. K., J. D. Wilson, et al. (2004). “Deducing ground-to-air emissions from observed trace gas concentrations: A field trial.” *Journal of Applied Meteorology* 43(3): 487-502.

Flesch, T. K. (1996). “The footprint for flux measurements, from backward Lagrangian stochastic models.” *Boundary-Layer Meteorology* 78(3-4): 399-404.

Flesch, T. K., J. D. Wilson, et al. (1995). “Backward-time Lagrangian stochastic dispersion models and their application to estimate gaseous emissions.” *Journal of Applied Meteorology* 34(6): 1320-1332.

**See Also**

[runbLS](#), [genInputList](#), [genSensors](#), [genSources](#), [genInterval](#), [genModel](#), [coreModel](#).

**Examples**

```
## Not run:
## set up some sensors and sources:
Sensors <- genSensors(
  PointSensor = list(x=0,y=0,z=2)
  ,LineSensor = list(x=c(-10,10),y=0,z=2,d=0.5)
)
Source <- genSources(Source1=list('c',M=c(0,20),R=10))

## get default Interval data with optimized MaxFetch:
Int <- genInterval(MaxFetch=-20)

## generate TD catalog with temporary touchdown catalogs:
Model <- genModel(TDwrite=FALSE)
InList <- genInputList(Sensors,Source,Int,Model)
Run <- runbLS(InList,Cat.Path=getwd())

## look at catalog
TDs <- readCatalog(getCatalogs(Run,rn=1,Sensor='PointSensor')[,Catalog])
plot(TDs,pch=20)

## temporary TD catalogs will be deleted on exiting R or
## by running the funtion cleanTemporary()

## End(Not run)
```

---

Class-Sensors*S3 methods for class Sensors*

---

**Description**

S3 methods for class Sensors:

**Usage**

```
## S3 method for class 'Sensors'
print(x, Nrows = 30, ...)
## S3 method for class 'Sensors'
head(x, ...)
## S3 method for class 'Sensors'
tail(x, ...)

## S3 method for class 'Sensors'
plot(x, ...)

## S3 method for class 'Sensors'
join(...)
```

**Arguments**

|       |                                                                                                  |
|-------|--------------------------------------------------------------------------------------------------|
| x     | a data.frame of class Sensors.                                                                   |
| Nrows | number of maximum rows to print without changing to compact display.                             |
| ...   | further arguments to be passed to other methods. For join.Sensors see the details section below. |

**Details**

For join.Sensors no further arguments other than different data.frames of class Sensor can be supplied.

**Author(s)**

Christoph Haeni

**See Also**

[bLSmodelR-package](#), [runbLS](#), [genSensors](#)

Class-Sources

*S3 methods for class Sources*

---

**Description**

S3 methods for class Sources:

**Usage**

```
## S3 method for class 'Sources'
print(x, Nrows = 30, ...)
## S3 method for class 'Sources'
head(x, ...)
## S3 method for class 'Sources'
tail(x, ...)

## S3 method for class 'Sources'
plot(x, ...)

## S3 method for class 'Sources'
join(...)
```

**Arguments**

|                    |                                                                                                               |
|--------------------|---------------------------------------------------------------------------------------------------------------|
| <code>x</code>     | a <code>data.frame</code> of class Sources.                                                                   |
| <code>Nrows</code> | number of maximum rows to print without changing to compact display.                                          |
| <code>...</code>   | further arguments to be passed to other methods. For <code>join.Sources</code> see the details section below. |

**Details**

For `join.Sources` no further arguments other than different `data.frames` of class Sources can be supplied.

**Author(s)**

Christoph Haeni

**See Also**

[bLSmodelR-package](#), [runbLS](#), [genSources](#)

---

|             |                                   |
|-------------|-----------------------------------|
| Class-TDcat | <i>S3 methods for class TDcat</i> |
|-------------|-----------------------------------|

---

**Description**

S3 methods for class TDcat:

**Usage**

```
## S3 method for class 'TDcat'
print(x, ...)

## S3 method for class 'TDcat'
plot(x, asp = 1, panel.first = {
  grid()
  abline(h = 0, col = "darkgrey")
  abline(v = 0, col = "darkgrey")
}, ...)
## S3 method for class 'TDcat'
points(x, ...)
```

**Arguments**

|                          |                                                                                    |
|--------------------------|------------------------------------------------------------------------------------|
| <code>x</code>           | a data.table of class TDcat.                                                       |
| <code>asp</code>         | y/x aspect ratio. see <a href="#">plot.window</a> .                                |
| <code>panel.first</code> | plotting expression prior to the main plotting. see <a href="#">plot.default</a> . |
| <code>...</code>         | further arguments to be passed to other methods.                                   |

**Author(s)**

Christoph Haeni

**See Also**

[bLSmodelR-package](#), [runbLS](#), [coreModel](#)

---

|                        |                                                 |
|------------------------|-------------------------------------------------|
| <code>coreModel</code> | <i>Calculate trajectories in backward mode.</i> |
|------------------------|-------------------------------------------------|

---

**Description**

This is the core function to calculate the (air parcel) trajectories in a backward mode (i.e. backward-in-time).

**Usage**

```
coreModel(u, v, w, zSens, ustar, L, Zo, bw, sigmaUstar, sigmaVstar,
  kv, C0, alpha, MaxFetch, method = "Euler")
```

**Arguments**

|            |                                                                                                                                                                                        |
|------------|----------------------------------------------------------------------------------------------------------------------------------------------------------------------------------------|
| u          | numeric vector. Instantaneous velocity of the individual air parcels at time 0 in alongwind direction (given in m/s).                                                                  |
| v          | instantaneous velocity of air parcel at time 0 in crosswind direction (given in m/s).                                                                                                  |
| w          | instantaneous velocity of air parcel at time 0 in vertical direction (given in m/s).                                                                                                   |
| zSens      | sensor height in m above ground level.                                                                                                                                                 |
| ustar      | friction velocity in m/s.                                                                                                                                                              |
| L          | Obukhov length in m.                                                                                                                                                                   |
| Zo         | roughness length in m.                                                                                                                                                                 |
| bw         | parameter defining the vertical profile of the variance in the vertical velocity component sigmaW.                                                                                     |
| sigmaUstar | variance of the alongwind velocity divided by ustar.                                                                                                                                   |
| sigmaVstar | variance of the crosswind velocity divided by ustar.                                                                                                                                   |
| kv         | von Karman constant (usually = 0.4).                                                                                                                                                   |
| C0         | Kolmogorov constant.                                                                                                                                                                   |
| alpha      | Fraction of the velocity decorrelation time scale as given in Flesch et al., 2004 to choose the time increment.                                                                        |
| MaxFetch   | maximum tracking distance of trajectories (in m).                                                                                                                                      |
| method     | the method of numerical discretization to be used. The default "Euler" corresponds to <i>Flesch et al. (1995)</i> . "RK4" corresponds to the classical (4th order) Runge-Kutta method. |

**Value**

A list with following items:

|            |                                                                                                                                                                      |
|------------|----------------------------------------------------------------------------------------------------------------------------------------------------------------------|
| Traj_IDOut | ID of the corresponding trajectory. This ID is identical to the indexing position of the initial velocities u, v and w (see calculation of w'C'/E in example below). |
| TimeOut    | Time until touchdown in seconds.                                                                                                                                     |
| xOut       | x position of touchdown.                                                                                                                                             |
| yOut       | y position of touchdown.                                                                                                                                             |
| wTDOut     | Touchdown velocity.                                                                                                                                                  |

**Author(s)**

Christoph Haeni

**References**

- Flesch, T. K., J. D. Wilson, et al. (1995). "Backward-time Lagrangian stochastic dispersion models and their application to estimate gaseous emissions." *Journal of Applied Meteorology* 34(6): 1320-1332.
- Flesch, T. K., J. D. Wilson, et al. (2004). "Deducing ground-to-air emissions from observed trace gas concentrations: A field trial." *Journal of Applied Meteorology* 43(3): 487-502.



**See Also**

[runbLS](#), [bLSmodelR-package](#).

**Examples**

```
## Not run:

## set up model parameters
zSigmaWu <- 2
zSens <- 2
Ustar <- 0.25
L <- -600
Zo <- 0.001
SigmaUu <- 4.5
SigmaVu <- 4
SigmaWu <- 1.7
kv <- 0.4
alpha <- 0.02
MaxFetch <- 500
A <- 0.5

bw <- calcbw(SigmaWu, zSigmaWu/L)
SigmaWm <- calcsigmaW(Ustar, zSens/L, bw)
U <- calcU(Ustar, Zo, L, zSens, kv)
C0 <- calcC0(bw, kv)

## initial velocities
N0 <- 1000
set.seed(1234)
TDcat <- initializeCatalog(N0, Ustar, SigmaUu, SigmaVu, bw,
  zSens, L, Zo, A, alpha, MaxFetch, kv)

uvw <- uvw0(TDcat)

## run trajectory calculation
TDList <- coreModel(uvw[, "u0"], uvw[, "v0"], uvw[, "w0"], zSens, Ustar,
  L, Zo, bw, SigmaUu, SigmaVu, kv, C0, alpha, MaxFetch)

## assign touchdowns to initalized Catalog:
assignCat(TDcat, TDList)

## Calculate C/E and w'C'/E ratios of entire domain with homogeneous
## emission rate:
Ci <- data.table(ID=1:N0, CE=0, u=uvw[, "u0"], v=uvw[, "v0"], w=uvw[, "w0"], key="ID")
Ci[TDcat[, sum(2/wTD), by=Traj_ID], CE:=V1]

stats <- Ci[, cbind(
  round(rbind(ce <- mean(CE), se <- sd(CE)/sqrt(N0), ce - 1.96*se, ce + 1.96*se), 1),
  round(rbind(wce <- mean(w*(cs <- CE-ce)), wse <- sd(w*cs)/sqrt(N0),
    , wce - 1.96*wse, wce + 1.96*wse), 2))]

dimnames(stats) <- list(c("E(X)", "SE", "Lower-CI95%", "Upper-CI95%"), c("C/E", "w'C'/E"))
print(stats)
```

```
## look at Catalog:
TDcat
plot(TDcat,pch=20)
```

```
## End(Not run)
```

---

deposition

*Dry Deposition Post-Processing*


---

## Description

Run the ‘bLSmodelR’ dry deposition post-processing function.

## Usage

```
deposition(x, vDep, rn = NULL, Sensor = NULL, Source = NULL, vDepSpatial = NULL, ncores = 1)
```

## Arguments

|                          |                                                                                                                                                                                                                                                                                                                                                                                            |
|--------------------------|--------------------------------------------------------------------------------------------------------------------------------------------------------------------------------------------------------------------------------------------------------------------------------------------------------------------------------------------------------------------------------------------|
| <code>x</code>           | A <code>data.frame</code> (or <code>data.table</code> ) of class <code>bLSresult</code> output by <code>runbLS</code> containing the results of a model run.                                                                                                                                                                                                                               |
| <code>vDep</code>        | either a numeric vector providing the model surface deposition velocity (at height <code>d + z0</code> ) for the rows specified by argument <code>index</code> or a character string specifying the column that contains the <code>vDep</code> values.                                                                                                                                     |
| <code>rn</code>          | integer. Subsetting by column ‘ <code>rn</code> ’. Only matching rows will be post-processed.                                                                                                                                                                                                                                                                                              |
| <code>Sensor</code>      | character. Subsetting by column ‘ <code>Sensor</code> ’. Only matching rows will be post-processed.                                                                                                                                                                                                                                                                                        |
| <code>Source</code>      | character. Subsetting by column ‘ <code>Source</code> ’. Only matching rows will be post-processed.                                                                                                                                                                                                                                                                                        |
| <code>vDepSpatial</code> | a list with two entries (this argument is still experimental!). First list entry is a named list or named vector that defines area names with corresponding deposition velocities. Second list entry is an object of class <code>Sources</code> (see <a href="#">genSources</a> ) that defines the geometry of those areas (see example below). Note: Areas should not overlap each other! |
| <code>ncores</code>      | integer. Number of cores used for parallel processing.                                                                                                                                                                                                                                                                                                                                     |

## Value

A `data.frame` (or `data.table`) of class `bLSresult` and `deposition` containing the results of the model run and the deposition post-processing. The following attribute is additionally attached to the existing `bLSresult` attributes:

**vDep** vector of surface deposition velocities

## Author(s)

Christoph Haeni

**See Also**

[bLSmodelR-package](#), [genInputList](#), [coreModel](#).

**Examples**

```
## Not run:
# Example Run with default values:
Sensor <- genSensors(
  PointSensor1=list(x=0,y=0,z=2)
  ,PointSensor2=list(x=10,y=0,z=2)
)
Sources <- genSources("Circle 1" = list("c", M = c(0,50), R = 10))
Ints <- genInterval(MaxFetch=70)
InputList <- genInputList(Sensor,Ints,Sources)

## run model
Run <- runbLS(InputList,Cat.Path=getwd())

## dry deposition post-processing:
RunDep <- deposition(Run,vDep=0.035,Sensor='PointSensor1')

## spatially inhomogeneous deposition velocity (still experimental!)
DepAreas <- genSources(
  "Circle 2" = list("c", M = c(0,30), R = 10)
  ,"Circle 3" = list("c", M = c(0,10), R = 10)
)
DepVel <- list("Circle 2" = 0.005,"Circle 3" = 0.01)
plot(Sensor,join(Sources,DepAreas),SourceTextArgs=list(labels=paste0('vDep = ',c(0,0.005,0.01))))
RunDep2 <- deposition(Run,vDep=0.035,Sensor='PointSensor1',vDepSpatial=list(DepVel,DepAreas))

## End(Not run)
```

---

genInputList

*Model Input*


---

**Description**

Create a list gathering the required model input.

**Usage**

```
genInputList(..., Tol.Zero = FALSE)
```

**Arguments**

... optional arguments containing pre-defined model input:

**Class-Interval** a data.frame as generated by [genInterval](#) containing the Interval input.

**Class-Sensors** a data.frame as generated by [genSensors](#) containing the Sensors input.

**Class-Sources** a data.frame as generated by [genSources](#) containing the Sources input.

**Class-Model** a list as generated by [genModel](#) containing the Model parameter input.

**Class-Tolerances** a data.frame as generated by [genTolerances](#) containing the Tolerances input.

**Tol.Zero** logical. If TRUE, all touchdown catalog selection tolerances will be set to zero.

### Value

a list containing all necessary model input.

### Author(s)

Christoph Haeni

### See Also

[genInterval](#), [genSensors](#), [genSources](#), [genModel](#), [genTolerances](#), [runbLS](#), [bLSmodelR-package](#).

### Examples

```
## Not run:
## generate source areas:
Sources <- genSources("Circle 1" = list("c", M = c(0,0), R = 10),
  "Circle 2" = list("c", M = c(0,30), R = 20, N = 50))

## generate sensors:
Sensors <- genSensors(LineSensor1=list(x=-30,y=c(-10,50),z=1.25,n=40)
  ,LineSensor2=list(x=30,y=c(-10,50),z=c(1.05,1.25),d=0.5))

## look at site map:
siteMap(Sensors,Sources,PolyArgs=list(col="darkgreen")
  ,PtArgs=list(pch=3,cex=0.8,lwd=2),SourceTextArgs=list(cex=1,col="navyblue")
  ,SensorTextArgs=list(cex=0.7,pos=3),xlim=c(-60,60))
addScaleBar()
addWindrose(WD = 270)

# generate interval data:
Int <- genInterval(WD=270,N0=1E4,SensorNames="LineSensor2",SourceNames="Circle 1,Circle 2")

## generate List of model input:
Model <- genModel(TDwrite=FALSE)
InputList <- genInputList(Int, Sources, Sensors, Model)

## run bLSmodelR (takes 2 to 5 mins):
Run <- runbLS(InputList,Cat.Path=getwd())

# switch names to "informative" and extract specific results (Source column is sorted accordingly)
switchNames(Run,simple=FALSE)
extractResult(Run,list(Source=c("Circle 2","Circle 1")),keep=c("Sensor","Source","C/E","C/E SE"))

## clean up TD catalogs
cleanTemporary()

## End(Not run)
```

| genInterval                                                                                                                                                                                                         | <i>Interval Data</i>                                                                                                                                                                                                                                 |
|---------------------------------------------------------------------------------------------------------------------------------------------------------------------------------------------------------------------|------------------------------------------------------------------------------------------------------------------------------------------------------------------------------------------------------------------------------------------------------|
| <b>Description</b>                                                                                                                                                                                                  |                                                                                                                                                                                                                                                      |
| Generate a data.frame providing data on an interval basis (i.e. processed Sonic-Anemometer data etc.).                                                                                                              |                                                                                                                                                                                                                                                      |
| <b>Usage</b>                                                                                                                                                                                                        |                                                                                                                                                                                                                                                      |
| <pre>genInterval(Data = NULL, Ustar = 0.25, L = -2000, Zo = 0.01, sUu = 2.5, sVu = 2,             sWu = 1.25, z_sWu = 2, WD = 0, d = 0, N0=5E4, MaxFetch=500, SensorNames = "",             SourceNames = "")</pre> |                                                                                                                                                                                                                                                      |
| <b>Arguments</b>                                                                                                                                                                                                    |                                                                                                                                                                                                                                                      |
| Data                                                                                                                                                                                                                | a data.frame. Columns that match argument names below will be taken as input to the correspondent argument. Columns that don't match will be appended as additional data.                                                                            |
| Ustar                                                                                                                                                                                                               | friction velocity in m/s.                                                                                                                                                                                                                            |
| L                                                                                                                                                                                                                   | Obukhov-Length in meters.                                                                                                                                                                                                                            |
| Zo                                                                                                                                                                                                                  | roughness length in meters.                                                                                                                                                                                                                          |
| sUu                                                                                                                                                                                                                 | scaled standard deviation of the wind speed component <b>u</b> (i.e. alongwind): sigmaU/ustar.                                                                                                                                                       |
| sVu                                                                                                                                                                                                                 | scaled standard deviation of the wind speed component <b>v</b> (i.e. crosswind): sigmaV/ustar.                                                                                                                                                       |
| sWu                                                                                                                                                                                                                 | scaled standard deviation of the vertical wind speed component <b>w</b> : sigmaW/ustar.                                                                                                                                                              |
| z_sWu                                                                                                                                                                                                               | measurement height of the wind statistics sigmaW/ustar (sWu) in meters. Only relevant for unstable conditions ( $L < 0$ ), where sigmaW/ustar is assumed to vary with height. Usually, this is the Sonic-Anemometer measurement height above ground. |
| WD                                                                                                                                                                                                                  | average wind direction in degrees deviating from North. I.e. wind blowing from 0/360 = north, 90 = east, 180 = south, 270 = west.                                                                                                                    |
| d                                                                                                                                                                                                                   | displacement height in meters.                                                                                                                                                                                                                       |
| N0                                                                                                                                                                                                                  | integer. Number of trajectories in model runs.                                                                                                                                                                                                       |
| MaxFetch                                                                                                                                                                                                            | numeric. Maximum upwind fetch (alongwind tracking distance). Negative numbers will try to optimize this value (see details below).                                                                                                                   |
| SensorNames                                                                                                                                                                                                         | Names of the Sensors to calculate TDs, separated by ','.                                                                                                                                                                                             |
| SourceNames                                                                                                                                                                                                         | Names of the Sources to include, separated by ','.                                                                                                                                                                                                   |

**Details**

Providing arguments directly will overwrite corresponding input from argument Data (see examples below).

Providing a negative MaxFetch argument will calculate the maximum distance between the sensor and the source and add the absolute value of the provided MaxFetch argument to this distance (see example below).

**Value**

a data.frame of class Sonic.

**Author(s)**

Christoph Haeni

**See Also**

[genInputList](#), [genSensors](#), [genSources](#), [genModel](#), [genTolerances](#), [runbLS](#), [bLSmodelR-package](#).

**Examples**

```
## Not run:
## default:
print(x <- genInterval())
class(x)

## providing Data argument:
dat <- data.frame(Ustar=0.2,L=c(-30,-300),add1='test',ustar=0.1)
genInterval(dat)

## partially overwriting Data argument:
genInterval(dat,Ustar=0.3)

## optimizing MaxFetch
Sensor <- genSensors(PS=list(x=0,y=0,z=2))
Source <- genSources(
  Src = list('c',M=c(0,50),R=20)
  ,Src = list(x = c(25,35,35,25), y = c(20,20,50,50))
)
Ints <- genInterval(WD=c(0,22.5,45,67.5),MaxFetch=-20)
InList <- genInputList(Ints,Source,Sensor)

IntExt <- prepareIntervals(InList,getwd())
IntExt[,MaxFetch]

## checking graphically:
plot(InList)
IntExt[,{
  x0 <- sin(WD/180*pi)
  y0 <- cos(WD/180*pi)
  x <- x0*(MaxFetch - 20)
  y <- y0*(MaxFetch - 20)
  for(i in 1:4){
    lines(c(0,x[i]),c(0,y[i]),lty=i)
    lines(x[i]+c(-100,100)*y0[i],y[i]-c(-100,100)*x0[i],lwd=2,col='lightgrey',lty=i)
  }}

## End(Not run)
```

---

|          |                         |
|----------|-------------------------|
| genModel | <i>Model Parameters</i> |
|----------|-------------------------|

---

**Description**

Generate a data.frame defining (global) model specific data.

**Usage**

```
genModel(kv = 0.4, A = 0.5, alpha = 0.02, wTdcutoff = 1E-4, TDwrite = TRUE,
         overwriteTD = TRUE, TDread = TRUE, TDonly = FALSE, ncores = 1)
```

**Arguments**

|             |                                                                                            |
|-------------|--------------------------------------------------------------------------------------------|
| kv          | von-Karman constant.                                                                       |
| A           | scaling constant. (see <i>Flesch et al. (2004)</i> )                                       |
| alpha       | time step fraction of the velocity decorrelation time scale. note: $\alpha > 10^{-3}$      |
| wTdcutoff   | cutoff velocity used as lower bound of calculated touchdown velocities.                    |
| TDwrite     | logical. Should touchdown catalogs be saved?                                               |
| overwriteTD | logical. Should existing touchdowns catalogs be overwritten?                               |
| TDread      | logical. Check for existing touchdown catalogs?                                            |
| TDonly      | logical. Skip calculation of C/E etc., only simulate touchdown catalogs? Default is FALSE. |
| ncores      | integer. Number of cores used for parallel processing.                                     |

**Value**

a list with the above defined model specifications. These model parameters are used ‘globally’, i.e. for all intervals, in the specified model run.

**Author(s)**

Christoph Haeni

**References**

Flesch, T. K., J. D. Wilson, et al. (2004). “Deducing ground-to-air emissions from observed trace gas concentrations: A field trial.” *Journal of Applied Meteorology* 43(3): 487-502.

**See Also**

[genInputList](#), [genInterval](#), [genSensors](#), [genSources](#), [genTolerances](#), [runBLS](#), [BLSmodelR-package](#).

**Examples**

```
## Not run:
## defaults:
genModel()

## End(Not run)
```

genSensors

*Sensor Geometry***Description**

Generate a `data.frame` providing sensor geometry data.

**Usage**

```
genSensors(...)
```

**Arguments**

... a `data.frame` and/or individual arguments defining point and/or line sensors.  
Names of arguments will be taken as sensor names. (see examples below)

**Details**

see examples below on the usage of `genSensors`...

**Value**

a `data.frame` of class `Sensors`

**Author(s)**

Christoph Haeni

**See Also**

[Class-Sensors](#), [genInputList](#), [genInterval](#), [genSources](#), [genModel](#), [genTolerances](#), [runbLS](#), [bLSmodelR-package](#).

**Examples**

```
## Not run:
## generate a point and two line sensors (way1):
Sensors1 <- genSensors(PointSensor=list(x=0,y=0,z=1.5)
  ,LineSensor1=list(x=c(-10,10),y=0,z=1.25,n=40)
  ,LineSensor2=list(x=0,y=c(-20,10),z=c(1.05,1.25),d=0.5))
Sensors1

## generate a point and two line sensors (way2):
SensorDF2 <- data.frame(c("PointSensor2","LS1b_1","LS1b_2","LS2b_1","LS2b_2"),c(0,-10,10,0,0)
  ,c(0,0,0,-20,10),c(1.5,1.25,1.25,1.05,1.25),c("", "LineSensor1b", "LineSensor1b", "LineSensor2b",
    "LineSensor2b"),c(1,40,0,NA,NA),c(0,0,0,0.5,0))
Sensors2 <- genSensors(SensorDF2)
Sensors2

## join Sensors data frames:
Sensors4 <- join(Sensors1,Sensors2)
Sensors4

siteMap(Sensors4,PtArgs=list(pch=4,cex=0.8,lwd=2,col="darkred"))
```



```
,SensorTextArgs=list(cex=0.7,pos=3),LSArgs = list(col="navyblue"))
addScaleBar()

## End(Not run)
```

---

genSources

*Source Geometry*


---

## Description

Generate a data.frame providing source geometry data.

## Usage

```
genSources(...)
```

## Arguments

... a list, a data.frame and/or individual arguments defining source areas. Names of list entries and/or arguments will be taken as source names. (see examples below)

## Details

see examples below on the usage of genSources...

## Value

a data.frame of class Sources

## Author(s)

Christoph Haeni

## See Also

[Class-Sources](#), [genInputList](#), [genInterval](#), [genSensors](#), [genModel](#), [genTolerances](#), [runbLS](#), [bLSmodelR-package](#).

## Examples

```
## Not run:
## generate 2 circular source areas:
Sources1 <- genSources(list(
  "Circle1" = list("c", M = c(0,0), R = 10),
  "Circle2" = list("c", M = c(0,30), R = 20, N = 50))
)
head(Sources1)

## generate a rectangular and a polygon source area:
Sources2 <- genSources(
  RectSource = list("r", x1 = -10, x2 = 10, y1 = 50, y2 = 70),
  Polygon = list(x = c(-40, -30, -20, -30), y = c(30, 20, 30, 40))
)
```

```

    )
Sources2

# join Sources:
Sources <- join(Sources1,Sources2)
head(Sources)
## look at site map:
siteMap(Sources,PolyArgs=list(col="darkgreen"),SourceTextArgs=list(cex=1,col="navyblue"))
addScaleBar()

## generate a source consisting of 3 circular polygon areas:
SouList <- lapply(list(c(-20,5),c(-20,-5),c(-11.3,0)),function(x)list("c",M=x,R=1,N=50))
names(SouList) <- rep("ArtSource",3)
Sources3 <- genSources(SouList)
head(Sources3)

siteMap(Sources3,PolyArgs=list(col="darkgreen")
,SourceTextArgs=list(cex=1,col="navyblue"),xlim=c(-5,15),ylim=c(-10,10))
addScaleBar()

## generate a rectangular source area from a data frame:
SouDF <- data.frame("Rect",c(-10,-10,10,10),c(50,70,70,50),1)
Sources4 <- genSources(SouDF)
Sources4

plot(join(Sources,Sources3,Sources4))

## End(Not run)

```

---

genTolerances

---

*Calculation Tolerances*


---

## Description

Generate a data frame defining calculation tolerances.

## Usage

```
genTolerances(Tol.Z = 2.5, Tol.L = 10, Tol.Zo = 5, Tol.sUu = 10, Tol.sVu = 10,
  Tol.sWu = 5, Tol.Zero = FALSE)
```

## Arguments

|        |                                                                                 |
|--------|---------------------------------------------------------------------------------|
| Tol.Z  | Tolerance (in %) of sensor height when checking existing touchdown catalogs.    |
| Tol.L  | Tolerance (in %) of Obukhov-Length when checking existing touchdown catalogs.   |
| Tol.Zo | Tolerance (in %) of roughness height when checking existing touchdown catalogs. |

|          |                                                                                                |
|----------|------------------------------------------------------------------------------------------------|
| Tol.sUu  | Tolerance (in %) of sigmaU/ustar when checking existing touchdown catalogs.                    |
| Tol.sVu  | Tolerance (in %) of sigmaV/ustar when checking existing touchdown catalogs.                    |
| Tol.sWu  | Tolerance (in %) of sigmaW/ustar (at sensor height) when checking existing touchdown catalogs. |
| Tol.Zero | logical. If TRUE, all touchdown catalog selection tolerances will be set to zero.              |

**Author(s)**

Christoph Haeni

**See Also**

[genInputList](#), [genInterval](#), [genSensors](#), [genSources](#), [genModel](#), [runbLS](#), [bLSmodelR-package](#).

**Examples**

```
## Not run:
## default:
genTolerances()

## Zero tolerances:
genTolerances(Tol.Zero=TRUE)

## End(Not run)
```

---

ModelFunctions

---

*Model functions*


---

**Description**

Functions to calculate some descriptive parameters outside of the model.

**Usage**

```
calcU(ustar, Zo, L, z, kv = 0.4)
calcepsilon(ustar, L, bw, z, kv = 0.4)
calcsigmaW(ustar, zL, bw)
calcC0(bw, kv = 0.4, A = 0.5)
calcTL(sigmaW, C0, epsilon)
calcbw(sigmaWustar, zL)
```

**Arguments**

|       |                                                                                      |
|-------|--------------------------------------------------------------------------------------|
| ustar | friction velocity in m/s.                                                            |
| Zo    | roughness length in meters.                                                          |
| L     | Obukhov-Length in meters.                                                            |
| z     | (aerodynamic) height in meters.                                                      |
| zL    | z/L.                                                                                 |
| bw    | scaled standard deviation of the vertical wind speed component <b>w</b> at $z = 0$ . |
| kv    | von-Karman constant.                                                                 |

|             |                                                                                                          |
|-------------|----------------------------------------------------------------------------------------------------------|
| A           | scaling constant. (see <i>Flesch et al. (2004)</i> )                                                     |
| sigmaW      | standard deviation of the vertical wind speed component <b>w</b> .                                       |
| C0          | Kolmogorov's (universal) constant                                                                        |
| epsilon     | dissipation rate of turbulent kinetic energy in $\text{m}^2/\text{s}^3$ .                                |
| sigmaWustar | scaled standard deviation of the vertical wind speed component <b>w</b> : $\text{sigmaW}/\text{ustar}$ . |

### Author(s)

Christoph Haeni

### References

Flesch, T. K., J. D. Wilson, et al. (2004). "Deducing ground-to-air emissions from observed trace gas concentrations: A field trial." *Journal of Applied Meteorology* 43(3): 487-502.

### See Also

example of [coreModel](#), [bLSmodelR-package](#).

---

|        |                      |
|--------|----------------------|
| runbLS | <i>Run bLSmodelR</i> |
|--------|----------------------|

---

### Description

Run 'bLSmodelR' using the specified model input.

### Usage

```
runbLS(ModelInput, Cat.Path = NULL, TOnly = NULL, ncores = NULL,
       writeCsv = FALSE, asDT = TRUE, simpleNames = asDT)
```

### Arguments

|             |                                                                                                                                                                                                                                                           |
|-------------|-----------------------------------------------------------------------------------------------------------------------------------------------------------------------------------------------------------------------------------------------------------|
| ModelInput  | a list of data.frames defining the model input as generated by <a href="#">genInputList</a> .                                                                                                                                                             |
| Cat.Path    | optional. Character string specifying the path to the touchdown catalogs folder.                                                                                                                                                                          |
| TOOnly      | logical. Skip calculation of C/E etc., only simulate touchdown catalogs? Default is FALSE.                                                                                                                                                                |
| ncores      | integer. Number of cores used for parallel processing.                                                                                                                                                                                                    |
| writeCsv    | either a logical value or a character string specifying the path to a text file where the results will be stored as semicolon separated values. If TRUE, the output file is selected via a tcltk GUI. If FALSE (default), no output file will be written. |
| asDT        | logical. If TRUE, the Output will be a <code>data.table</code> . The default FALSE returns a <code>data.frame</code> .                                                                                                                                    |
| simpleNames | logical. Use simple column names for Output, if TRUE. Default FALSE provides more descriptive column names.                                                                                                                                               |

**Value**

A `data.frame` (or `data.table`) of class `bLSresult` containing the results of the model run. The following attributes are additionally attached:

**CalcSteps** a `data.table` containing the individual model calculation intervals. Keys: `rn`, `Sensor`

**CatPath** path to catalog folder

**Catalogs** a `data.table` containing the catalog names. Keys: `rn`, `Sensor`, `Cat.Name`

**ModelInput** the `ModelInput` as supplied.

**Author(s)**

Christoph Haeni

**References**

Flesch, T. K., J. D. Wilson, et al. (1995). “Backward-time Lagrangian stochastic dispersion models and their application to estimate gaseous emissions.” *Journal of Applied Meteorology* 34(6): 1320-1332.

**See Also**

[bLSmodelR-package](#), [genInputList](#), [coreModel](#).

**Examples**

```
## Not run:
# Example Run with default values:
Sensor <- genSensors(PointSensor=list(x=0,y=0,z=2))
Ints <- genInterval(N0=1E4)
InputList <- genInputList(Sensor,Ints)

## run model
Run <- runbLS(InputList,Cat.Path=getwd())

## get catalog
TDcat <- readCatalog(getCatalogs(Run))

# look at TD catalog:
TDcat
plot(TDcat)

## End(Not run)
```

---

Undocumented Functions

*undocumented functions*

---

**Description**

List of undocumented `bLSmodelR` functions:

## Details

- %w/o%: x without y, analogous to [%in%](#)
- addScaleBar: add a scale bar to the current plot
- addWindrose: add a wind rose (arrow showing wind direction) to the current plot
- assignCat: assign [coreModel](#) output to an empty, initialized TD catalog
- CalcSteps: Get attribute CalcSteps from bLS output
- Catalogs: Get attribute Catalogs from bLS output
- CatPath: Get attribute CatPath from bLS output
- check.compact: check TD catalog for compact attributes
- cleanTemporary: remove temporary TD catalogs
- compactCatalog: make TD catalog compact for saving (not reversible due to rounding!)
- ConcPalette: Colour palette
- extractResult: extract results from model output
- FluxPalette: Colour palette
- getArea: get area of a polygon
- getCatalogs: get TD catalog pathnames from model output
- initializeCatalog: initialize TD catalog
- join: see [join.Sensors](#) and [join.Sources](#)
- ModelInput: Get attribute ModelInput from bLS output
- prepareIntervals: link existing and upcoming TD catalogs to intervals and possibly optimize MaxFetch
- plot.InputList: S3method calling siteMap
- plotFootprint: plot C-/u'C' -/w'C'-Footprint
- readCatalog: read TD catalog
- rebuildCatListFile: rebuild file with TD catalog list
- rotate: rotate coordinates around a fix point
- rotateCatalog: rotate Catalog (into WD)
- round125: round digits to nearest predefined numbers
- siteMap: plot site map
- sortData: sort data, partially adopted from [setorderv](#)
- tagInside: tag TDs inside source area
- updatePath: update path to TD catalogs
- uvw0: get initial (t=0) velocities from TD catalog
- writeCatalog: write TD catalog (default: saved as compact TD catalog)
- switchNames: change column names (simple/descriptive) of model output
- setDT: change model output to a `data.table`, see [setDT](#)
- setDF: change model output to a `data.frame`, see [setDF](#)

## Note

some of these functions will be documented or dropped in future package versions.

**Author(s)**

Christoph Haeni

**See Also**

[bLSmodelR-package](#), [runbLS](#)

# Index

## \*Topic **package**

    bLSmodelR-package, [2](#)  
%w/o% (Undocumented Functions), [21](#)  
%in%, [22](#)  
  
addScaleBar (Undocumented Functions), [21](#)  
addWindrose (Undocumented Functions), [21](#)  
assignCat (Undocumented Functions), [21](#)  
  
bLSmodelR (bLSmodelR-package), [2](#)  
bLSmodelR-package, [2](#)  
  
calcbw (ModelFunctions), [19](#)  
calcC0 (ModelFunctions), [19](#)  
calcepsilon (ModelFunctions), [19](#)  
calcsigmaW (ModelFunctions), [19](#)  
CalcSteps (Undocumented Functions), [21](#)  
calcTL (ModelFunctions), [19](#)  
calcU (ModelFunctions), [19](#)  
Catalogs (Undocumented Functions), [21](#)  
CatPath (Undocumented Functions), [21](#)  
check.compact (Undocumented Functions),  
    [21](#)  
Class-Sensors, [5](#), [11](#)  
Class-Sources, [6](#), [12](#)  
Class-TDcat, [7](#)  
cleanTemporary (Undocumented  
    Functions), [21](#)  
compactCatalog (Undocumented  
    Functions), [21](#)  
ConcPalette (Undocumented Functions), [21](#)  
coreModel, [4](#), [7](#), [7](#), [11](#), [20–22](#)  
  
deposition, [10](#)  
  
extractResult (Undocumented Functions),  
    [21](#)  
  
FluxPalette (Undocumented Functions), [21](#)  
  
genInputList, [3](#), [4](#), [11](#), [11](#), [14–17](#), [19–21](#)  
genInterval, [4](#), [11](#), [12](#), [13](#), [15–17](#), [19](#)  
genModel, [3](#), [4](#), [12](#), [14](#), [15](#), [16](#), [17](#), [19](#)  
genSensors, [4](#), [5](#), [11](#), [12](#), [14](#), [15](#), [16](#), [17](#), [19](#)  
genSources, [4](#), [6](#), [10](#), [12](#), [14–16](#), [17](#), [19](#)

genTolerances, [12](#), [14–17](#), [18](#)  
getArea (Undocumented Functions), [21](#)  
getCatalogs (Undocumented Functions), [21](#)  
  
head.Sensors (Class-Sensors), [5](#)  
head.Sources (Class-Sources), [6](#)  
  
initializeCatalog (Undocumented  
    Functions), [21](#)  
  
join (Undocumented Functions), [21](#)  
join.Sensors, [22](#)  
join.Sensors (Class-Sensors), [5](#)  
join.Sources, [22](#)  
join.Sources (Class-Sources), [6](#)  
  
ModelFunctions, [19](#)  
ModelInput (Undocumented Functions), [21](#)  
  
parallel, [3](#)  
plot.default, [7](#)  
plot.InputList (Undocumented  
    Functions), [21](#)  
plot.Sensors (Class-Sensors), [5](#)  
plot.Sources (Class-Sources), [6](#)  
plot.TDcat (Class-TDcat), [7](#)  
plot.window, [7](#)  
plotFootprint (Undocumented Functions),  
    [21](#)  
points.TDcat (Class-TDcat), [7](#)  
prepareIntervals (Undocumented  
    Functions), [21](#)  
print.Sensors (Class-Sensors), [5](#)  
print.Sources (Class-Sources), [6](#)  
print.TDcat (Class-TDcat), [7](#)  
  
readCatalog (Undocumented Functions), [21](#)  
rebuildCatListFile (Undocumented  
    Functions), [21](#)  
rotate (Undocumented Functions), [21](#)  
rotateCatalog (Undocumented Functions),  
    [21](#)  
round125 (Undocumented Functions), [21](#)  
runbLS, [3–7](#), [9](#), [10](#), [12](#), [14–17](#), [19](#), [20](#), [23](#)



Sensors (Class-Sensors), [5](#)  
setDF, [22](#)  
setDF (Undocumented Functions), [21](#)  
setDT, [22](#)  
setDT (Undocumented Functions), [21](#)  
setorderv, [22](#)  
siteMap (Undocumented Functions), [21](#)  
snowfall, [3](#)  
sortData (Undocumented Functions), [21](#)  
Sources (Class-Sources), [6](#)  
switchNames (Undocumented Functions), [21](#)  
  
tagInside (Undocumented Functions), [21](#)  
tail.Sensors (Class-Sensors), [5](#)  
tail.Sources (Class-Sources), [6](#)  
TDcat (Class-TDcat), [7](#)  
  
Undocumented (Undocumented Functions),  
    [21](#)  
Undocumented Functions, [21](#)  
updatePath (Undocumented Functions), [21](#)  
uvw0 (Undocumented Functions), [21](#)  
  
writeCatalog (Undocumented Functions),  
    [21](#)
