# Supplementary material for: Accounting for Field-Scale Dry Deposition in Backward Lagrangian Stochastic Dispersion Modelling of NH<sub>3</sub> Emissions
Source: Preprints.org preprint supplement (doi:10.20944/preprints201803.0026.v1), 2018-03-03
Supplement: Supplementary file 3 [file supplementary]

Archive with 3 entries (3 files):
- Supplement S1.zip
- Supplement S2.pdf
- Supplement S3.pdf
